# Supplementary material for: Construction of Fluorescent Conjugated Polytriazole Containing Double-Decker Silsesquioxane: Click Polymerization and Thermal Stability
Source: MDPI journal article supplement (doi:10.3390/polym15020331), 2023-01-09
Supplement: s1 [file s1]

## Supporting Information

### Construction of Fluorescent Conjugated Polytriazole Containing Double-Decker Silsesquioxane: Click Polymerization and Thermal Stability

Chia-Husan Chiang<sup>1</sup>, Mohamed Gamal Mohamed<sup>1,2,\*</sup>, Wei-Cheng Chen<sup>1</sup>,  
Manivannan Madhu<sup>3</sup>, Wei-Lung Tseng<sup>3</sup> and Shiao-Wei Kuo<sup>1,4,\*</sup>

<sup>1</sup>Department of Materials and Optoelectronic Science, College of Semiconductor and Advanced Technology Research, Center for Functional Polymers and Supramolecular Materials, National Sun Yat-Sen University, Kaohsiung 804, Taiwan

<sup>2</sup>Chemistry Department, Faculty of Science, Assiut University, Assiut, Egypt

<sup>3</sup>Department of Chemistry, National Sun Yat-sen University, Kaohsiung 804, Taiwan

<sup>4</sup>Department of Medicinal and Applied Chemistry, Kaohsiung Medical University, Kaohsiung 807, Taiwan

Corresponding authors:

E-mail: mgamal.eldin34@gmail.com (M. G. Mohamed), and  
(kuosw@faculty.nsysu.edu.tw (S. W. Kuo).

### Characterization

FTIR spectra were recorded using a Bruker Tensor 27 FTIR spectrophotometer with a resolution of 4 cm<sup>-1</sup> through the KBr disk method. <sup>1</sup>H and <sup>13</sup>C Nuclear magnetic resonance (NMR) spectra were recorded using an INOVA 500 instrument with CDCl<sub>3</sub>

as the solvent and TMS as the external standard; chemical shifts are reported in parts per million (ppm). Dynamic thermal curing kinetics were measured using a TA Q-20 differential scanning calorimeter with ca. 7 mg sample on the DSC sample pan under a N<sub>2</sub> atmosphere (100 mL min<sup>-1</sup>), with heating from -80 to 350 °C at a heating rate of 10 °C min<sup>-1</sup>. The thermal stabilities of the samples were examined under a N<sub>2</sub> using a TA Q-50 thermogravimetric analyzer; each cured sample (ca. 5 mg) was placed in a Pt cell and heated at a rate of 20 °C min<sup>-1</sup> from 40 to 800 °C under a N<sub>2</sub> flow rate of 60 mL min<sup>-1</sup>. The morphologies of the polymer samples were examined using scanning electron microscopy (SEM; JEOL-6330) and using transmission electron microscopy (TEM; JEOL-2100) instrument operated at an accelerating voltage of 200 kV. Emission spectra of all samples were recorded using Horiba FluoroMax4+ apparatus (integration time: 0.1 s, slit width: 3 nm) with Fluoromax software.

**Table S1.** MALDI TOF results of B-DDSQ, BPA-DDSQ, CO-DDSQ, NP-DDSQ and TPE-DDSQ copolymers.

| Sample name | M <sub>n</sub> | M <sub>w</sub> | PDI   |
|-------------|----------------|----------------|-------|
| B-DDSQ      | 2262           | 2919           | 1.288 |
| BPA-DDSQ    | 2291           | 2975           | 1.298 |
| CO-DDSQ     | 2218           | 2867           | 1.292 |
| NP-DDSQ     | 2219           | 2844           | 1.281 |
| TPE-DDSQ    | 2129           | 2717           | 1.276 |

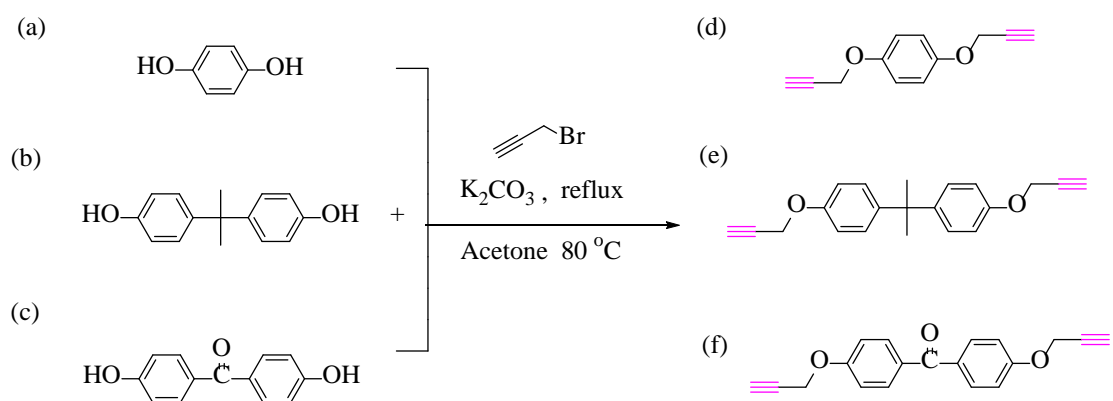

**Scheme S1.** Synthesis of (a) P-B, (b) P-BPA, and (c) P-CO monomers.

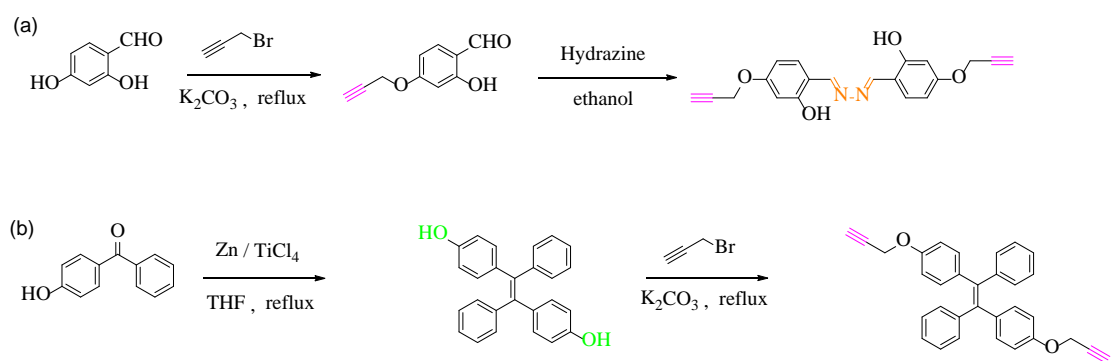

**Scheme S2.** Synthesis of (a) P-NP, and (b) P-TPE monomers.

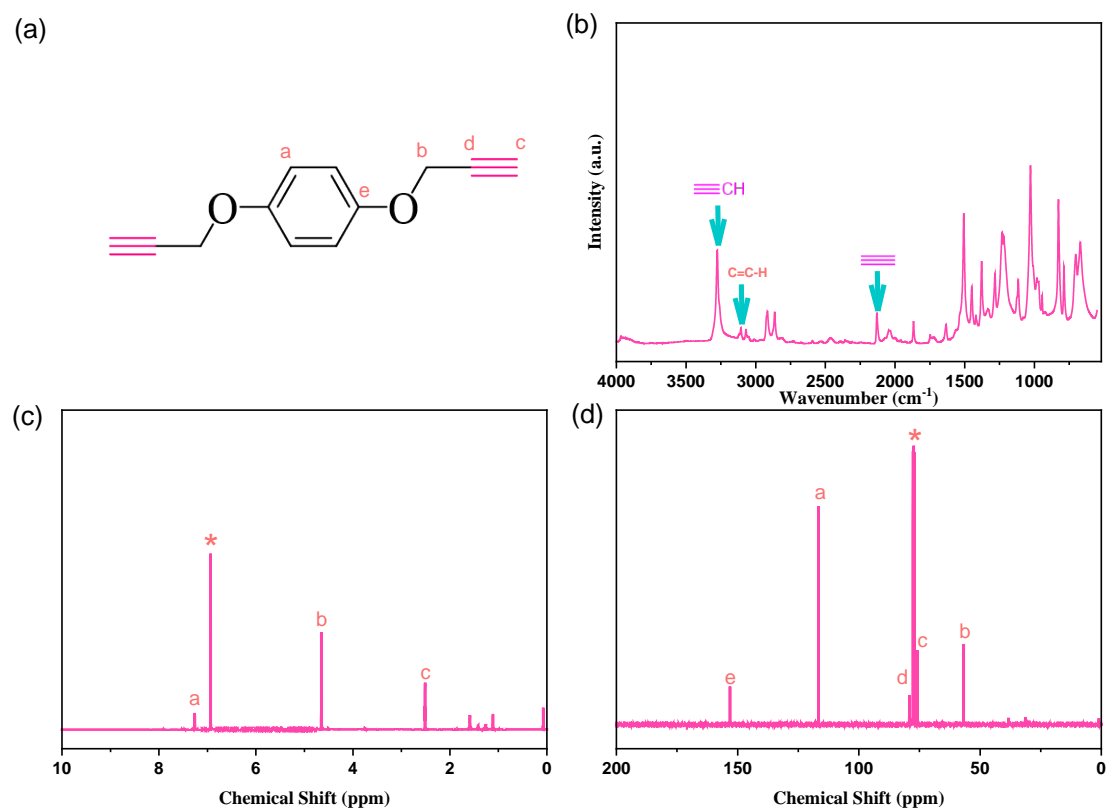

**Figure S1.** (a) chemical structure, (b) FTIR, (c) <sup>1</sup>H NMR, and (d) <sup>13</sup>C NMR spectra of P-B. \* is the CDCl<sub>3</sub> peak.

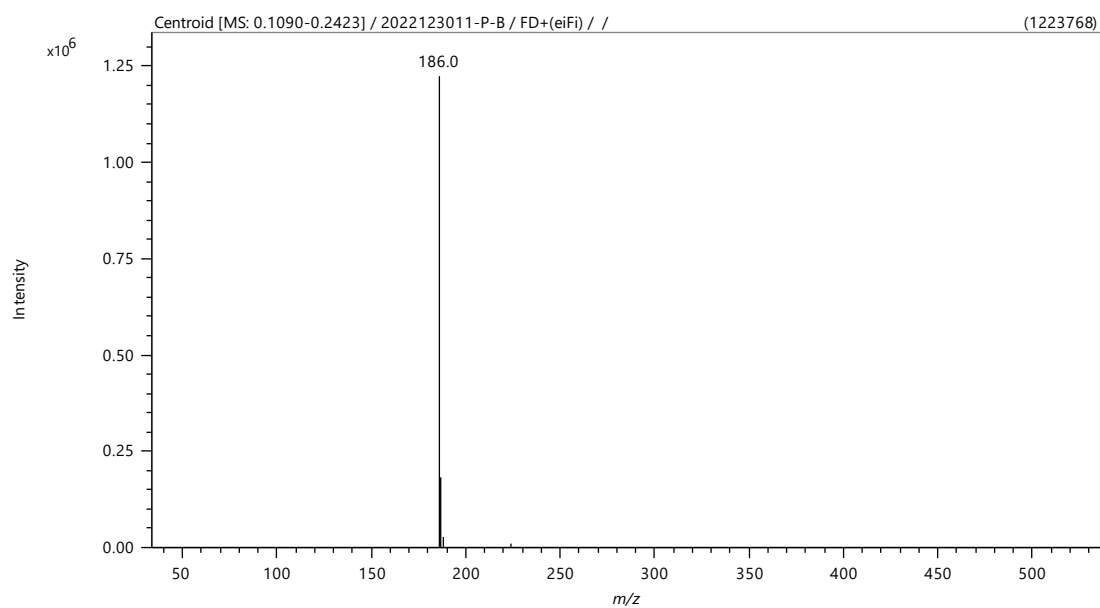

**Figure S2.** High Resolution-FD-MS spectrum of P-B.

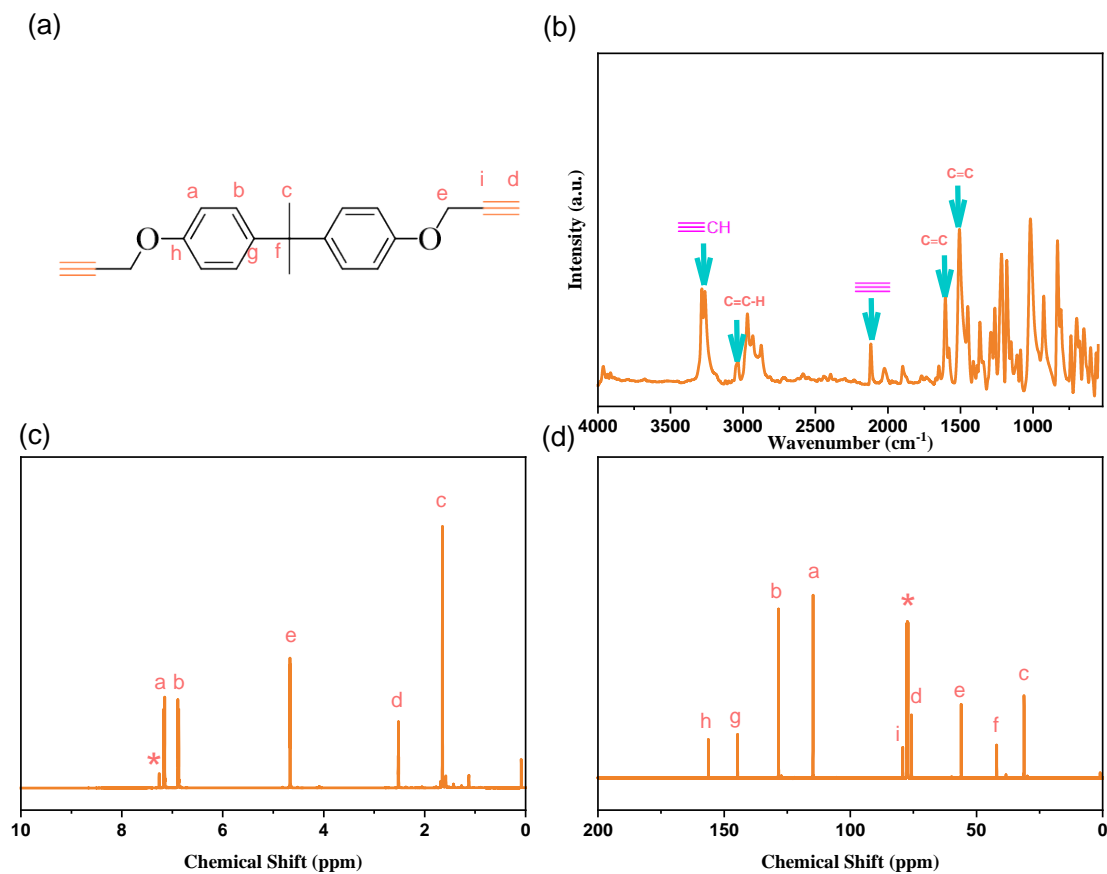

**Figure S3.** (a) chemical structure, (b) FTIR, (c)  $^1\text{H}$  NMR, and (d)  $^{13}\text{C}$  NMR spectra of P-BPA. \* is the  $\text{CDCl}_3$  peak.

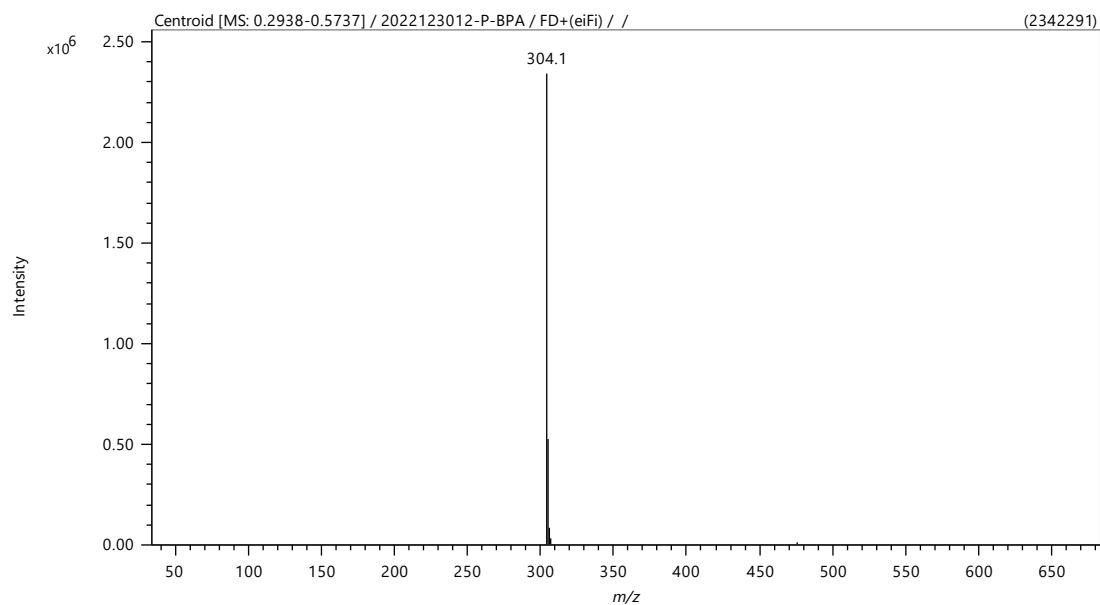

**Figure S4.** High Resolution-FD-MS spectrum of P-BPA.

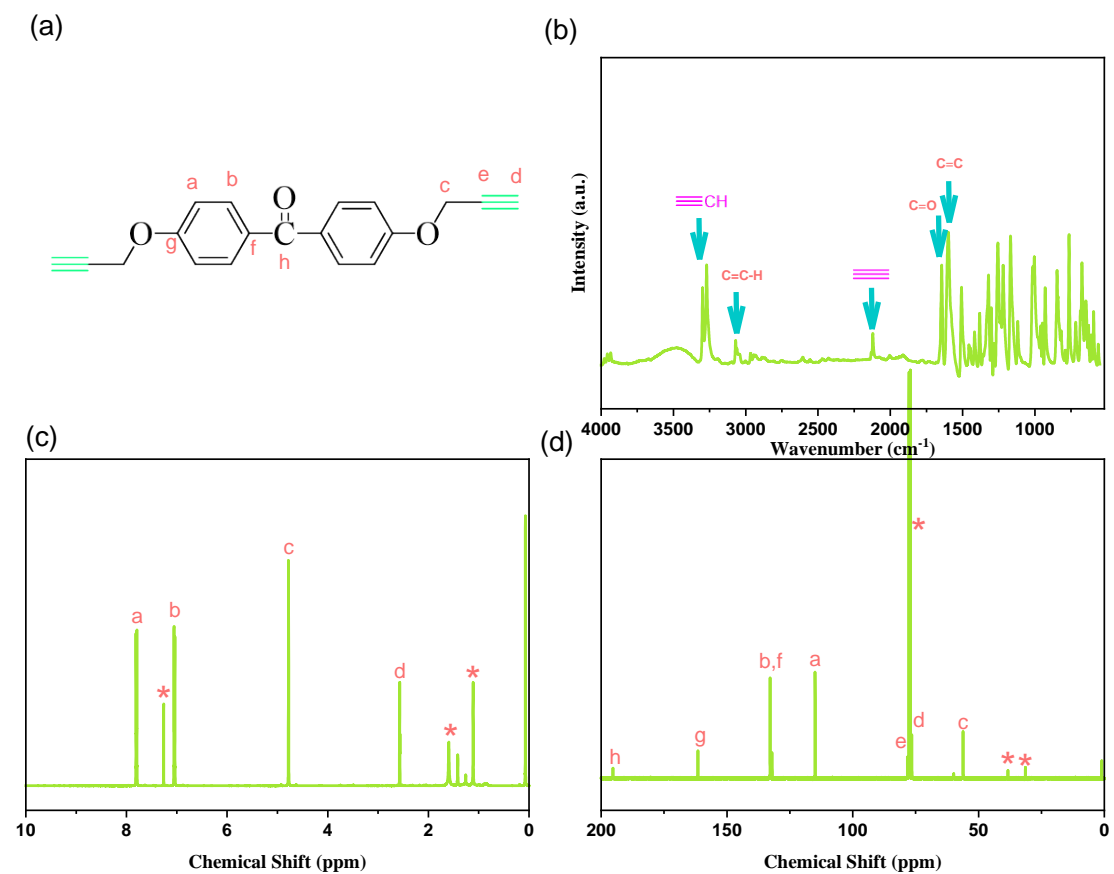

**Figure S5.** (a) chemical structure, (b) FTIR, (c)  $^1\text{H}$  NMR, and (d)  $^{13}\text{C}$  NMR spectra of P-CO. \* is the  $\text{CDCl}_3$  peak.

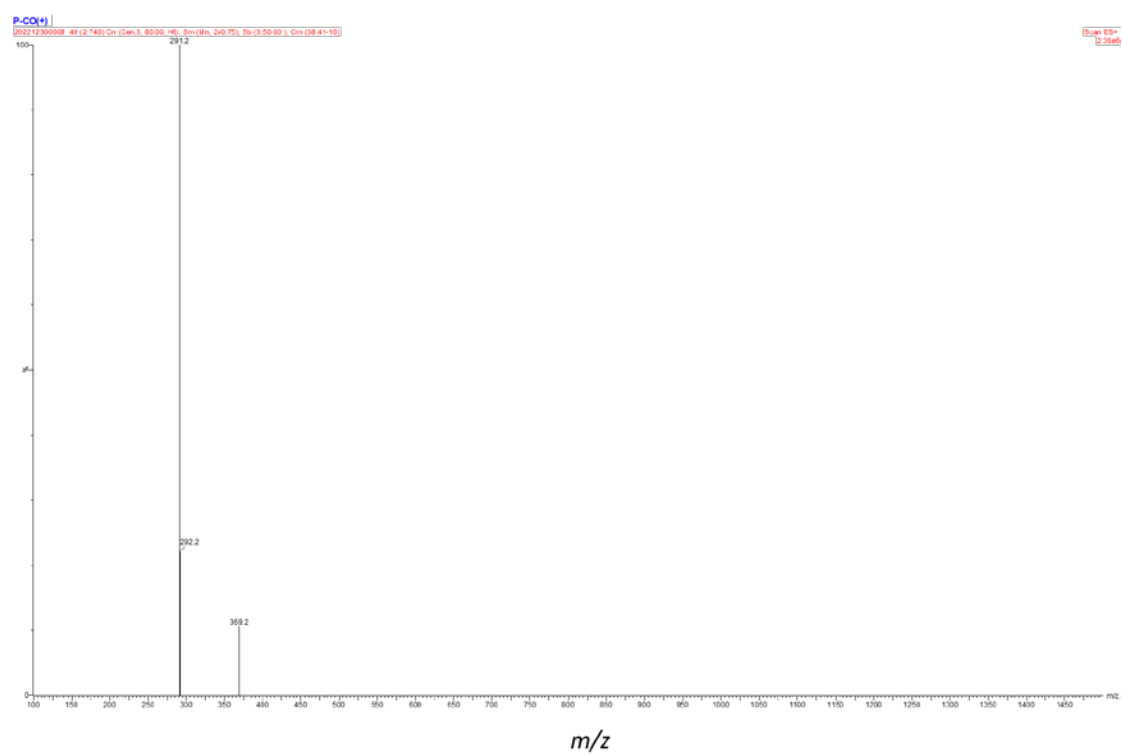

**Figure S6.** High-Resolution MS spectrum of P-CO<sub>2</sub>.

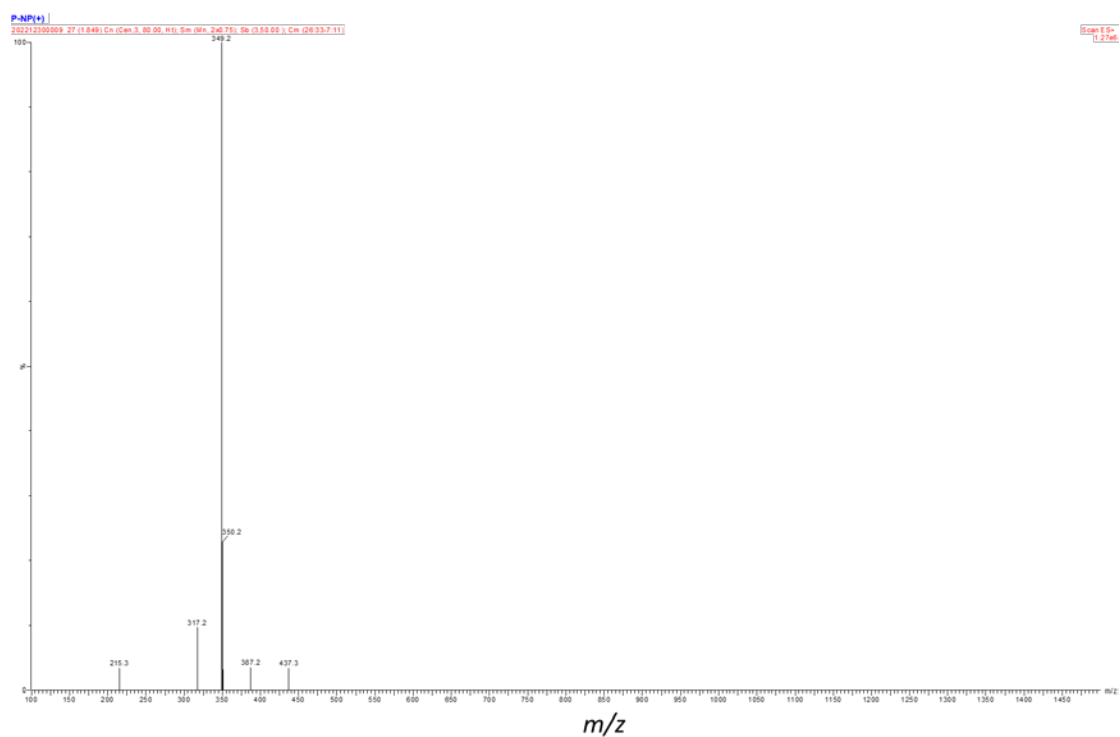

**Figure S7.** High Resolution-FD-MS spectrum of P-NP.

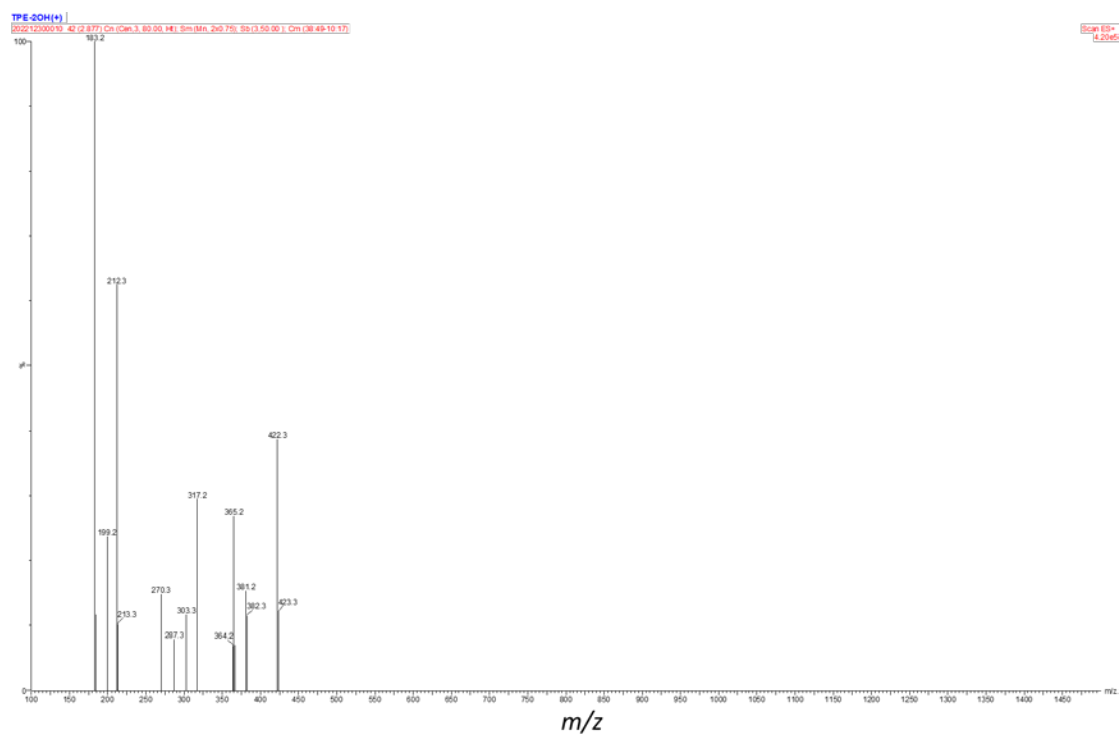

**Figure S8.** High-Resolution MS spectrum of TPE-2OH.



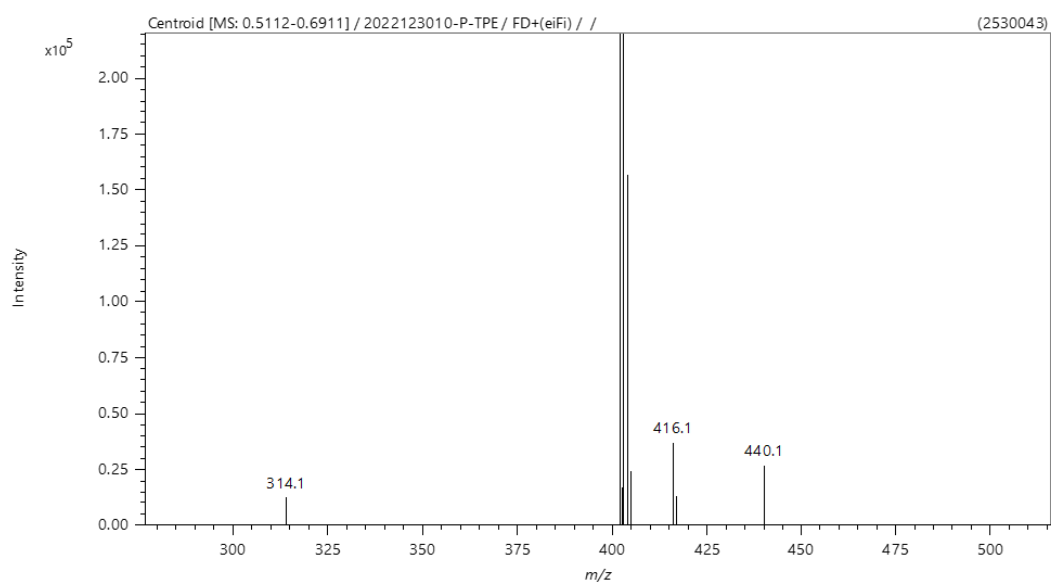

**Figure S9.** High Resolution-FD-MS spectrum of P-TPE.

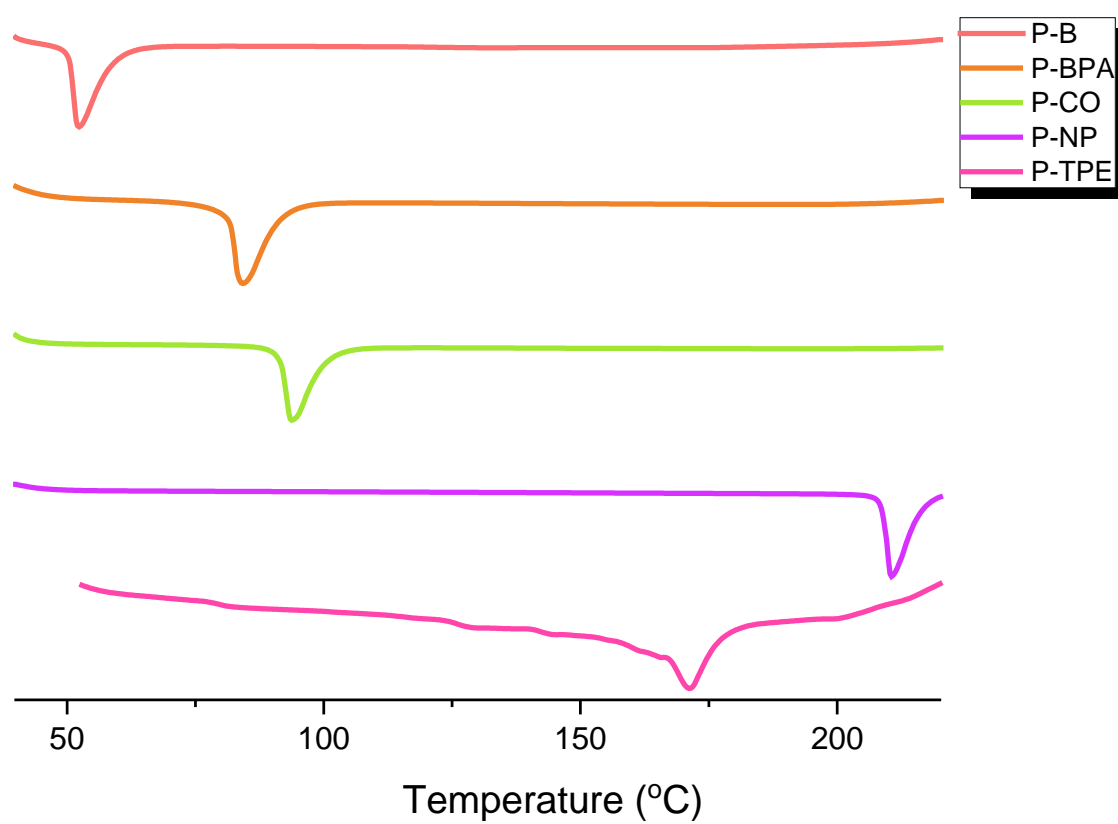

**Figure S10.** DSC profiles of P-B, P-BPA, P-CO, P-NP, and P-TPE.

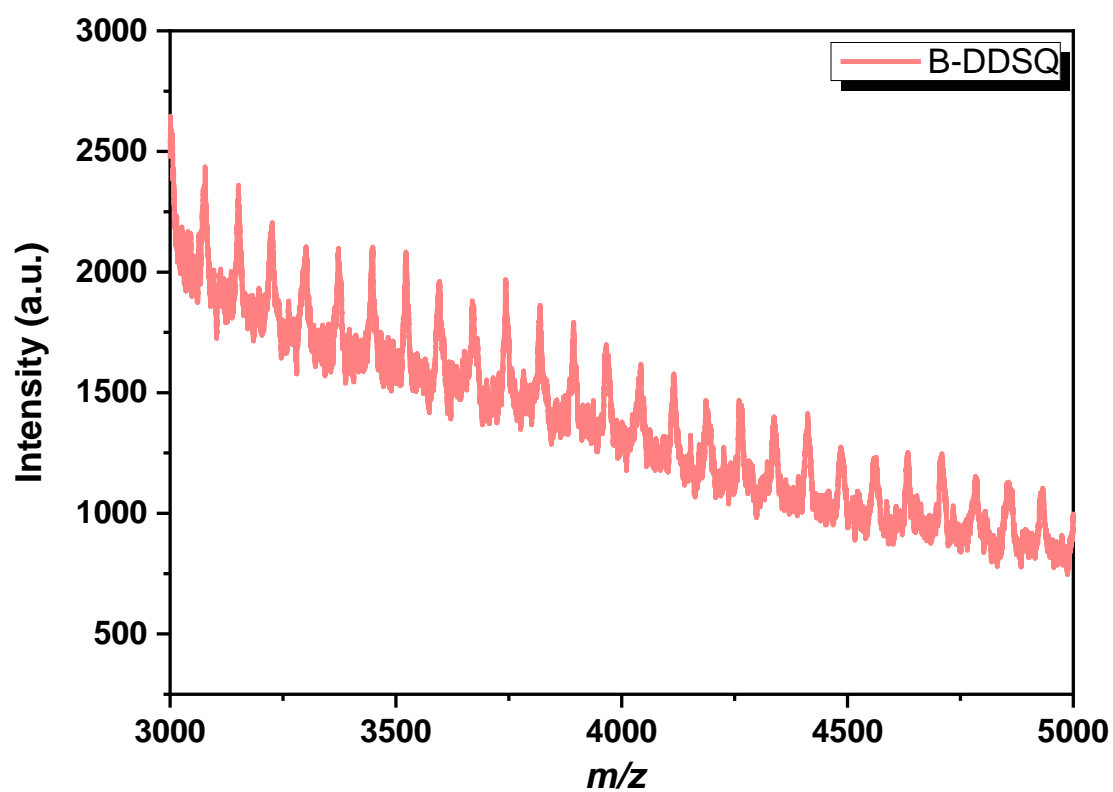

Figure S11. MALDI TOF profile of B-DDSQ.

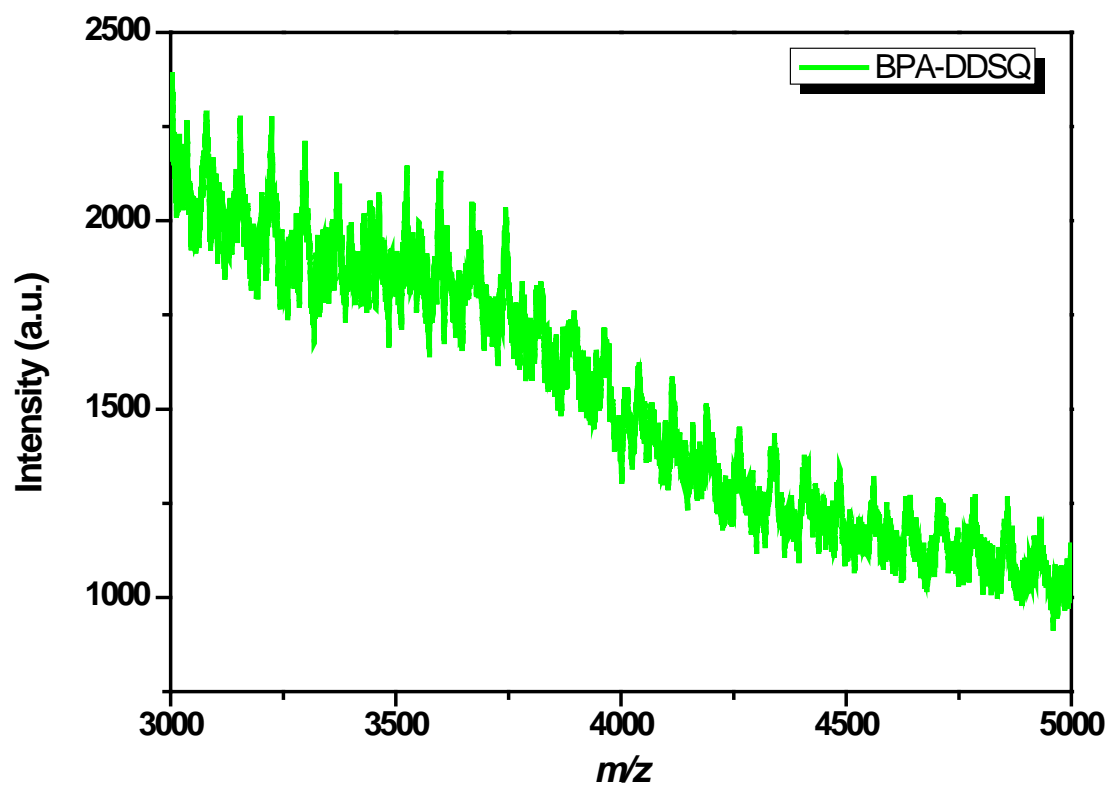

Figure S12. MALDI TOF profile of BPA-DDSQ.

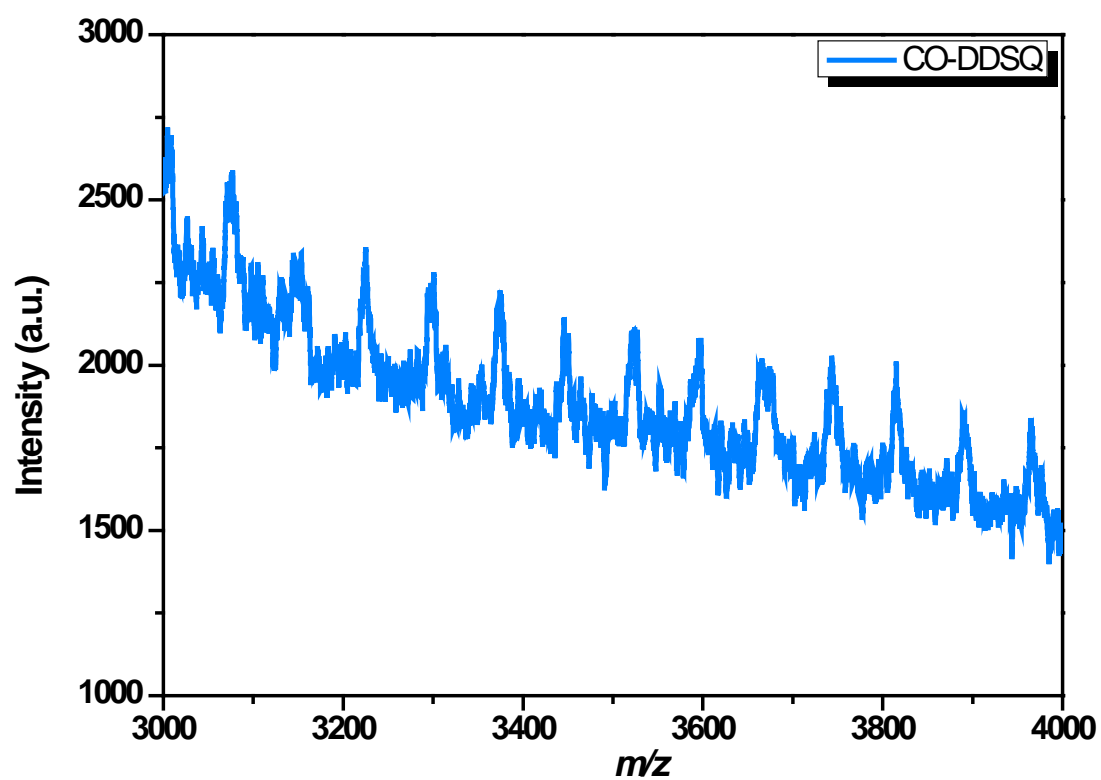

Figure S13. MALDI TOF profile of CO-DDSQ.

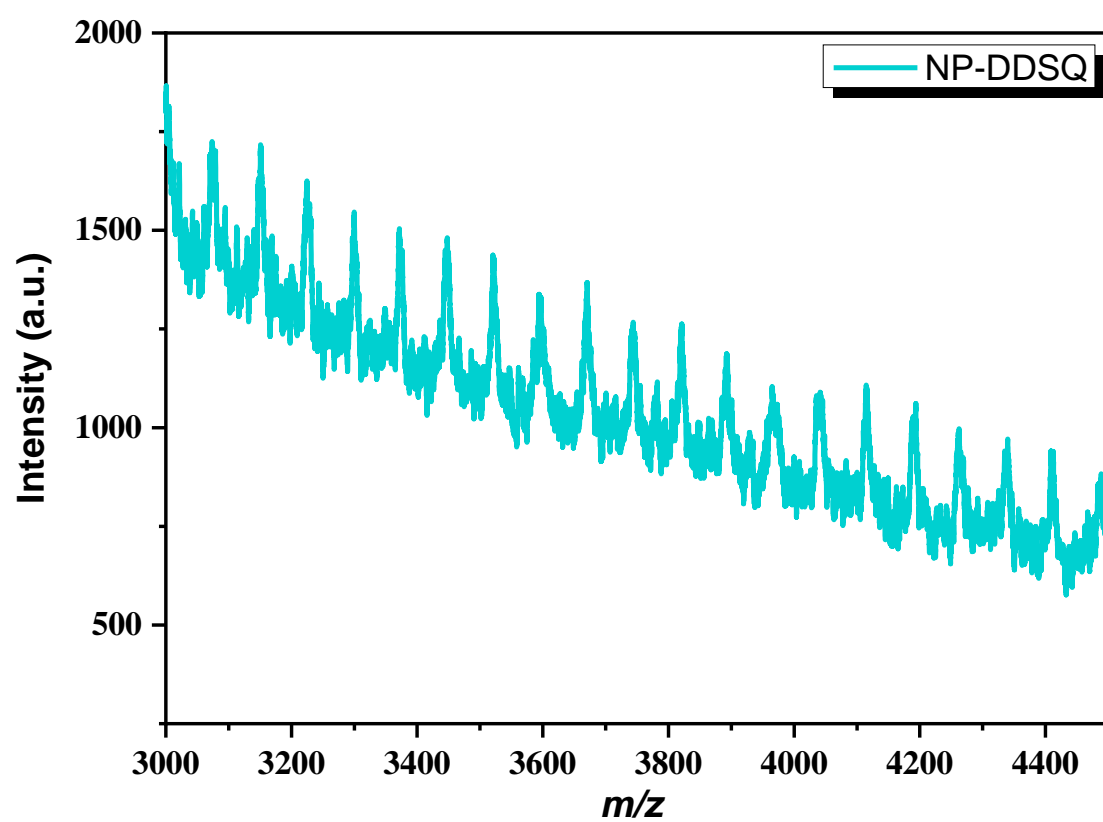

Figure S14. MALDI TOF profile of NP-DDSQ.

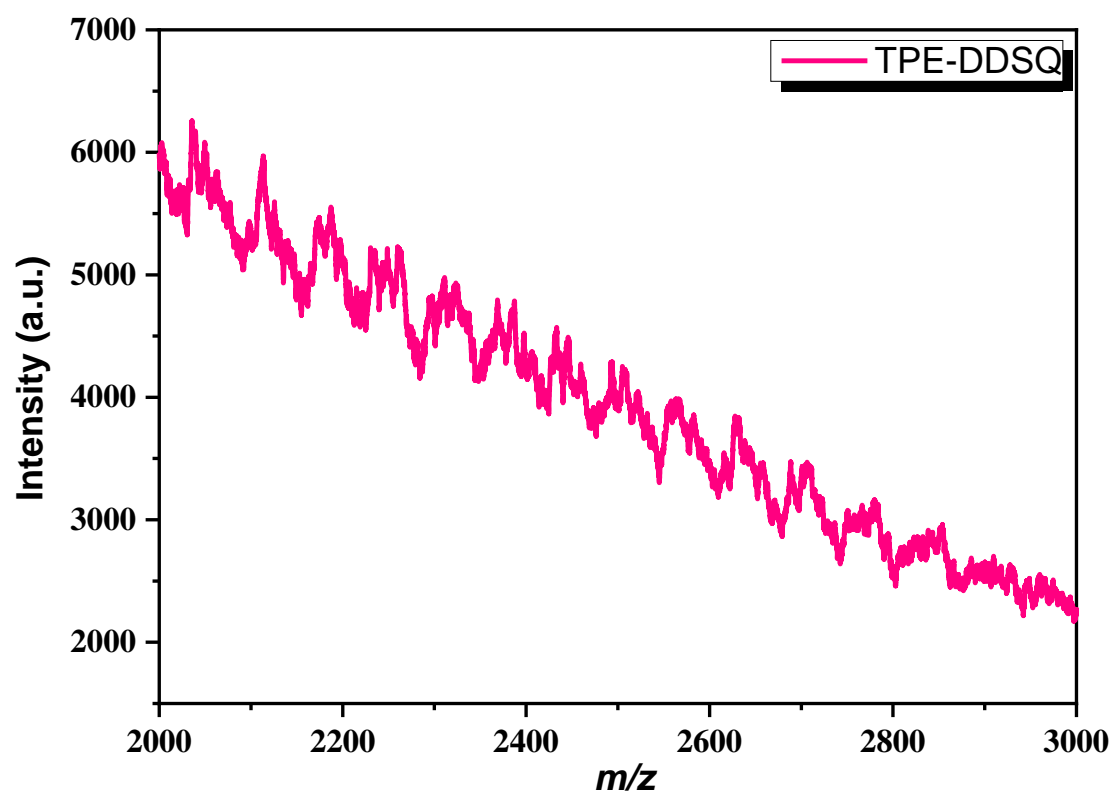

**Figure S15.** MALDI TOF profile of TPE-DDSQ.

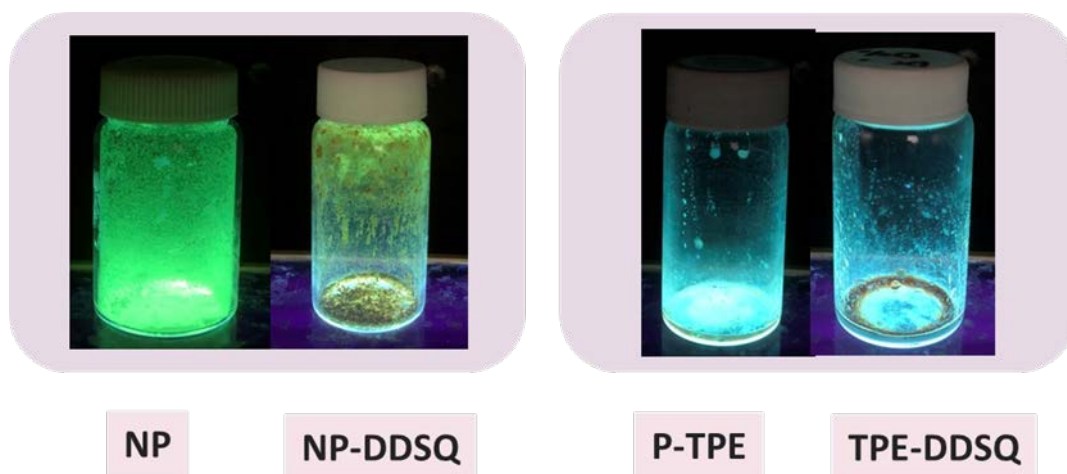

**Figure S16.** Photo images of NP, P-TPE, NP-DDSQ, and TPE-DDSQ samples under a UV lamp with an excitation wavelength of 365 nm.

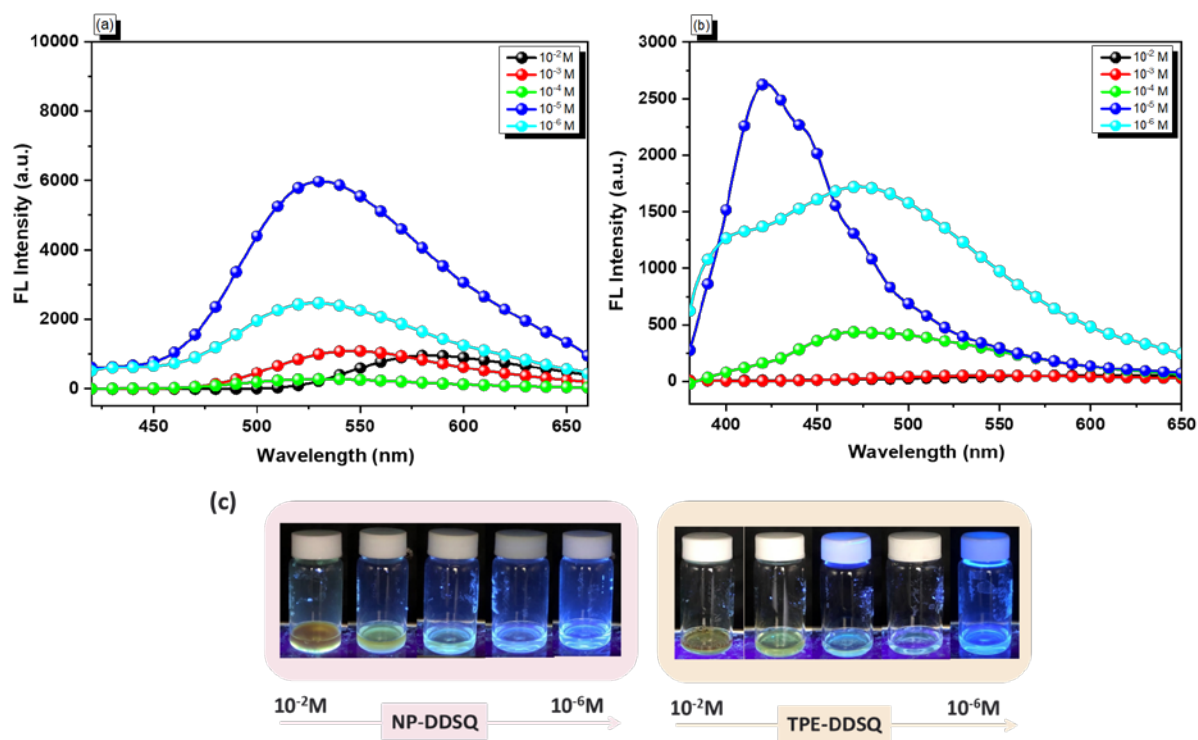

**Figure S17.** PL spectra of NP-DDSQ (a), (b) TPE-DDSQ, and (c) photo images of NP-DDSQ and TPE-DDSQ in THF solution with different concentrations from  $10^{-2}$  to  $10^{-6}$  M [excitation wavelength was 365 nm].

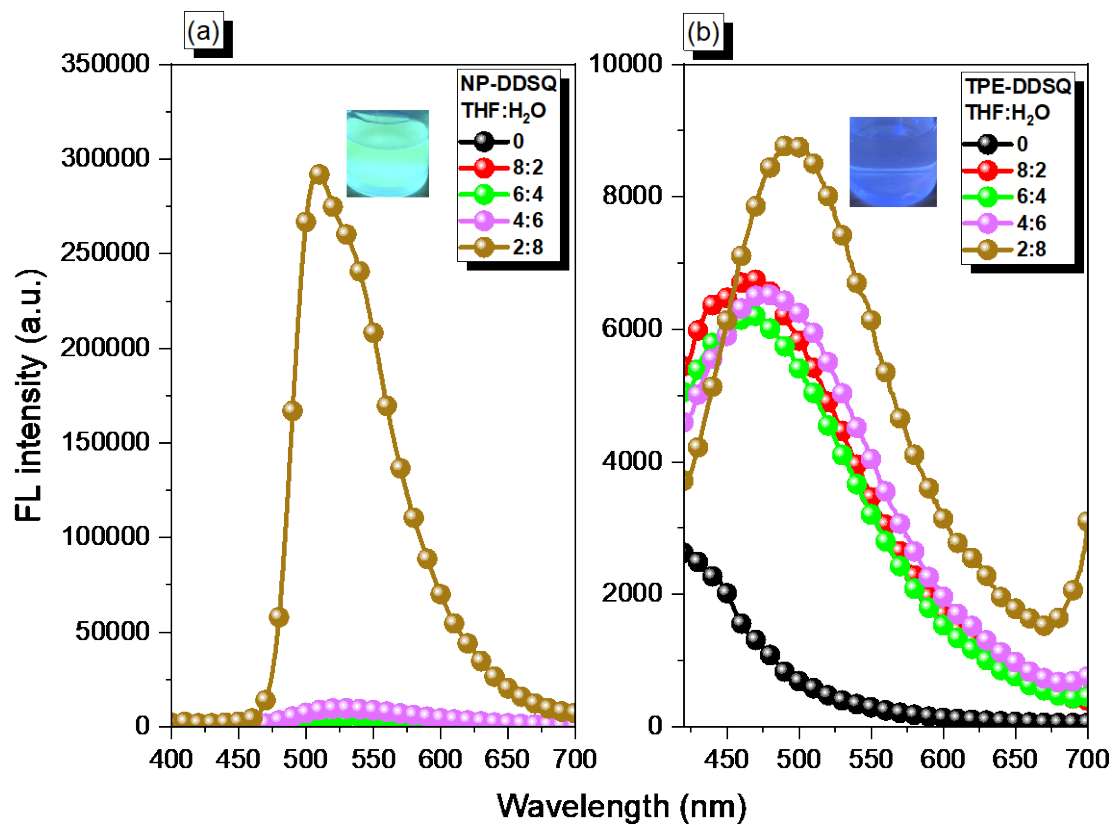

**Figure S18.** PL spectra of (a) NP-DDSQ and (b) TPE-DDSQ copolymers in THF solution ( $10^{-5}$  M) with different water contents [ $\lambda_{\text{excitation}} = 365$  nm].

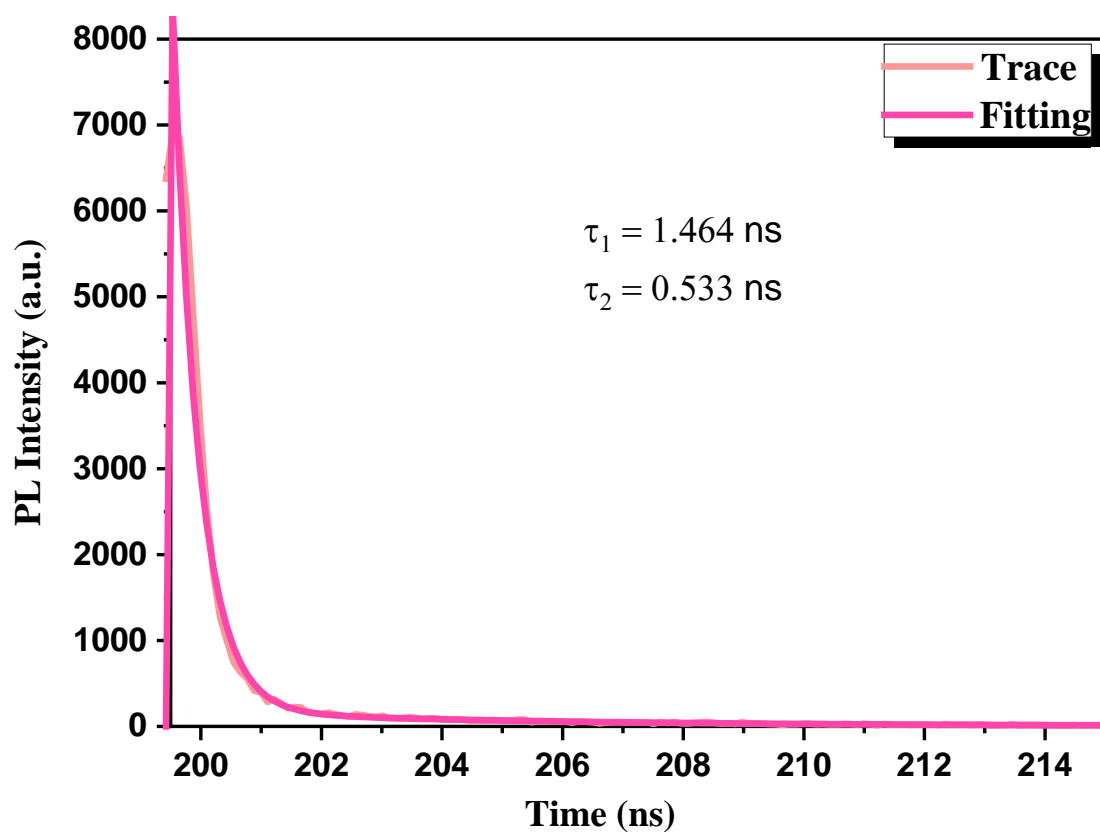

**Figure S19.** Fluorescence lifetime decay of NP-DDSQ copolymer.

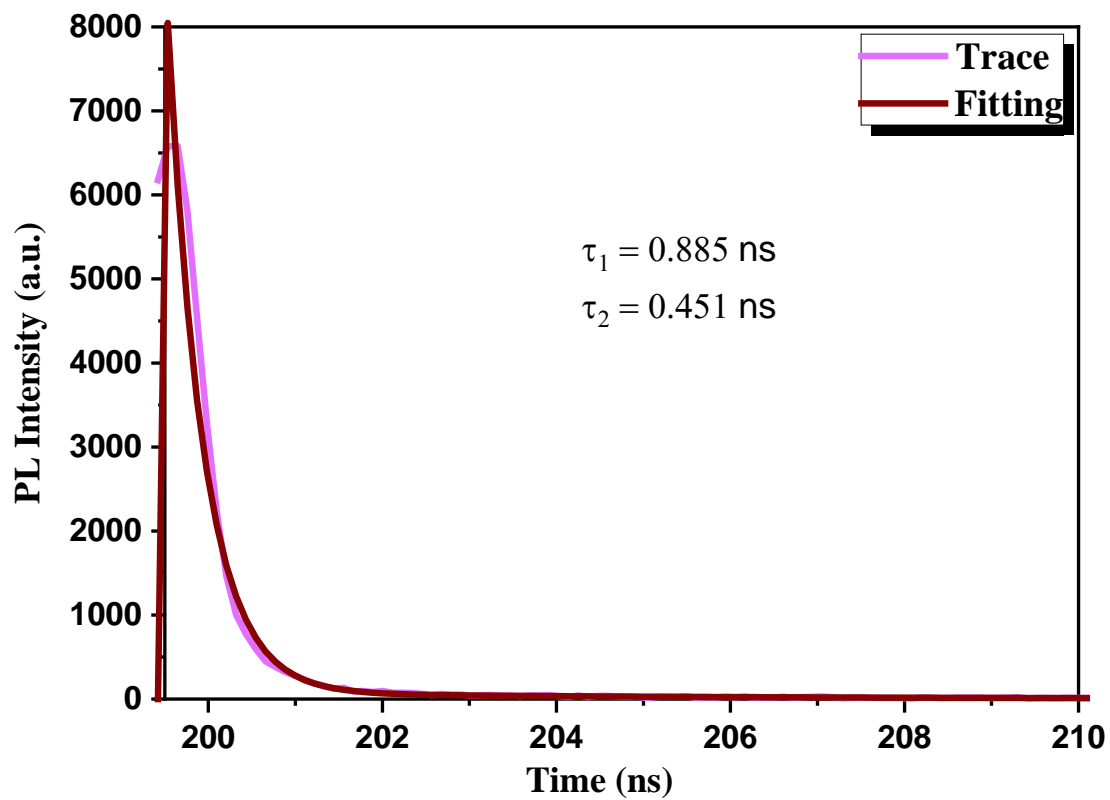

**Figure S20.** Fluorescence lifetime decay of TPE-DDSQ copolymer.
